# Supplementary material
Source: Elsevier journal article supplement (https://publikationen.ub.uni-frankfurt.de/files/33574/mmc1.pdf)
Supplement: mmc1 [file mmc1.pdf]

**Supplemental Data**

**Decreased *STARD10* Expression Is Associated  
with Defective Insulin Secretion  
in Humans and Mice**

**Gaëlle R. Carrat, Ming Hu, Marie-Sophie Nguyen-Tu, Pauline Chabosseau, Kyle J. Gaulton, Martijn van de Bunt, Afshan Siddiq, Mario Falchi, Matthias Thurner, Mickaël Canouil, François Pattou, Isabelle Leclerc, Timothy J. Pullen, Matthew C. Cane, Priyanka Prabhala, William Greenwald, Anke Schulte, Piero Marchetti, Mark Ibberson, Patrick E. MacDonald, Jocelyn E. Manning Fox, Anna L. Gloyn, Philippe Froguel, Michele Solimena, Mark I. McCarthy, and Guy A. Rutter**

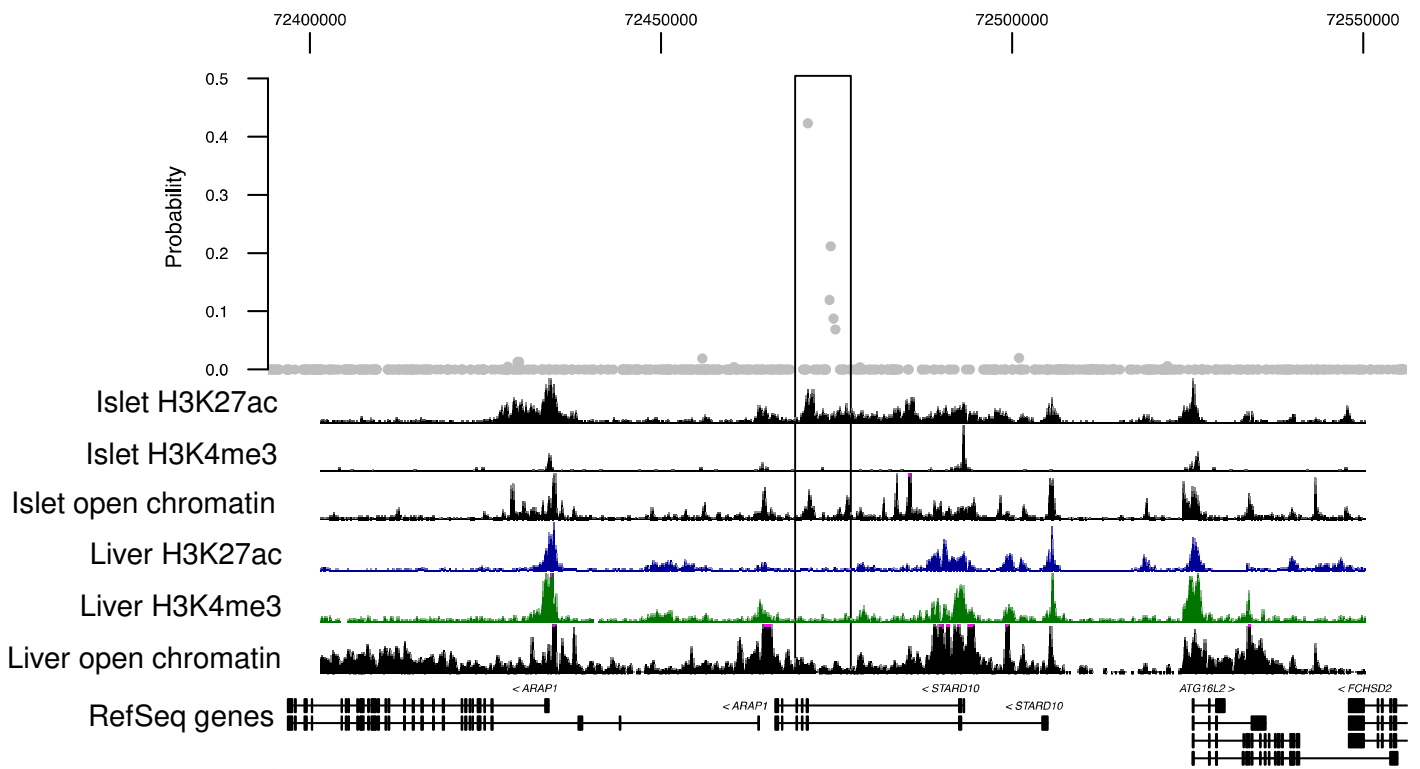

Figure S1

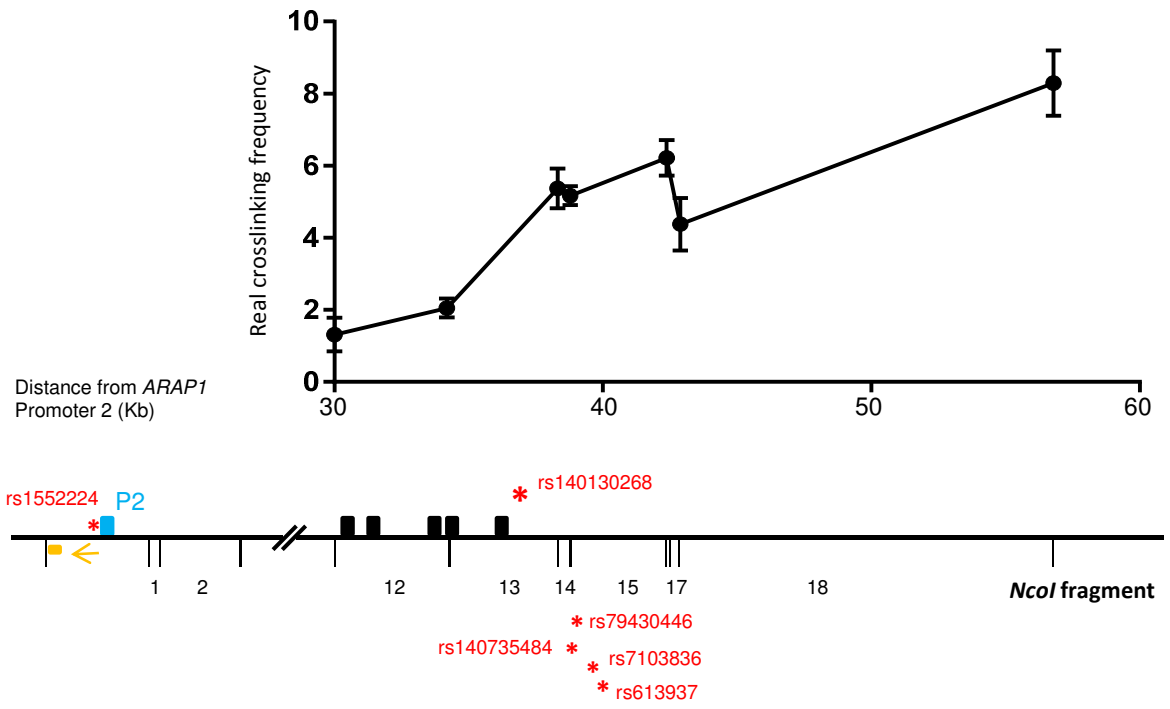

Figure S2

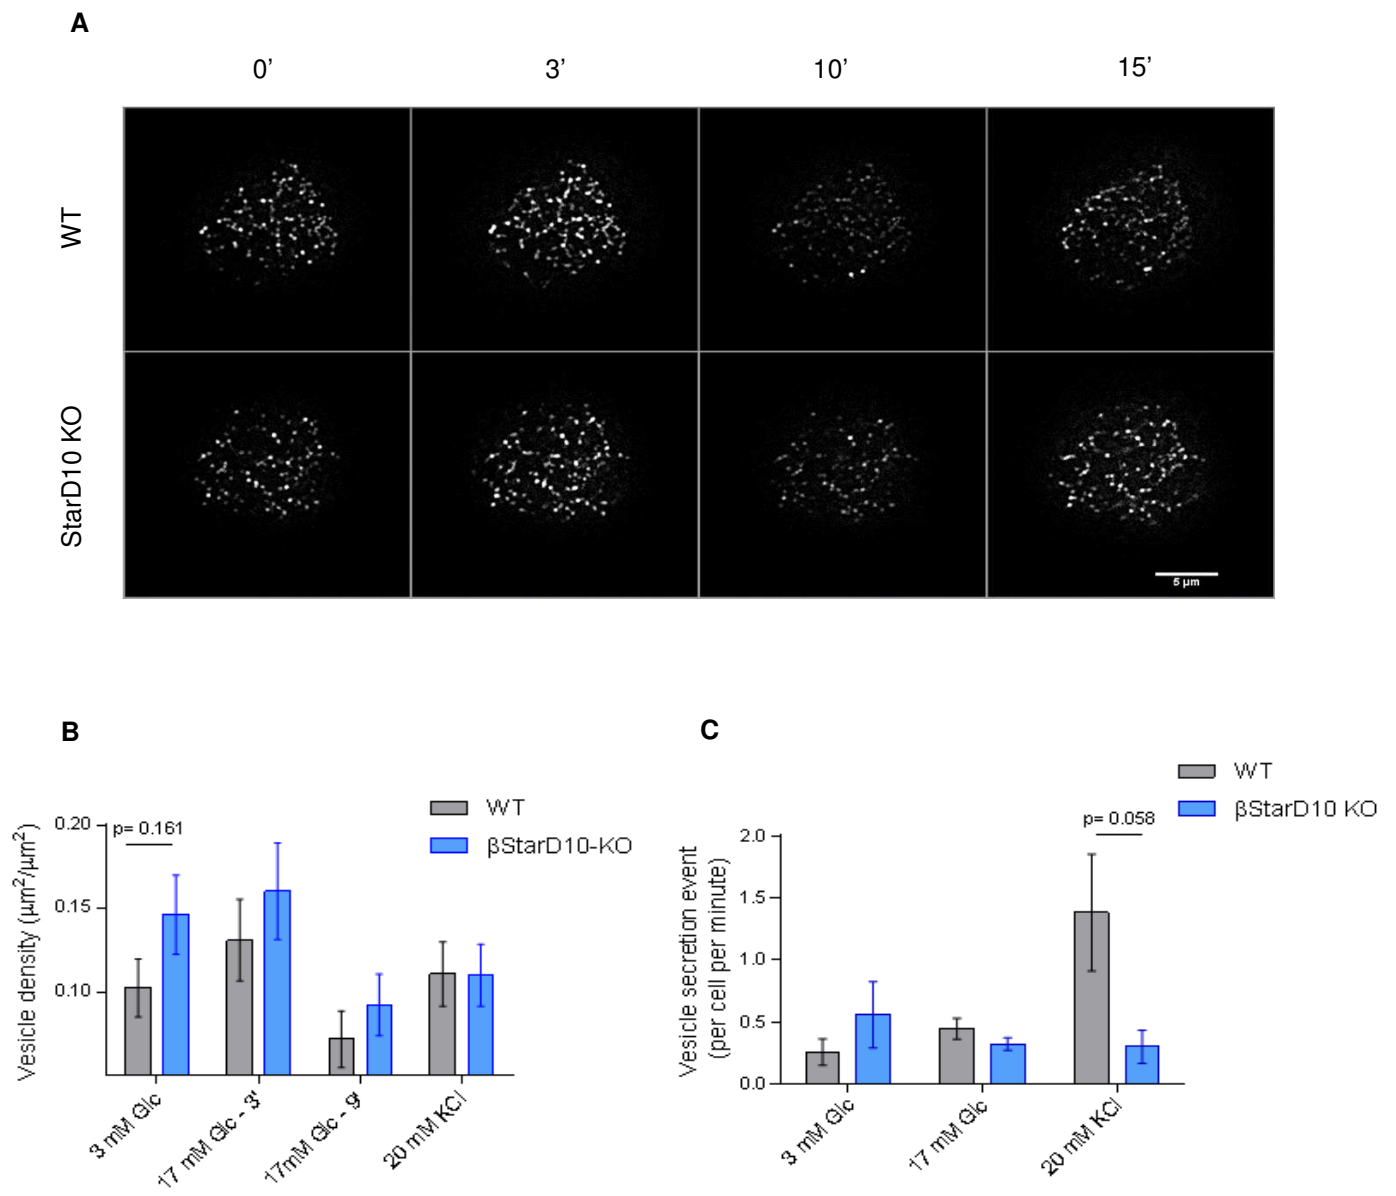

Figure S3

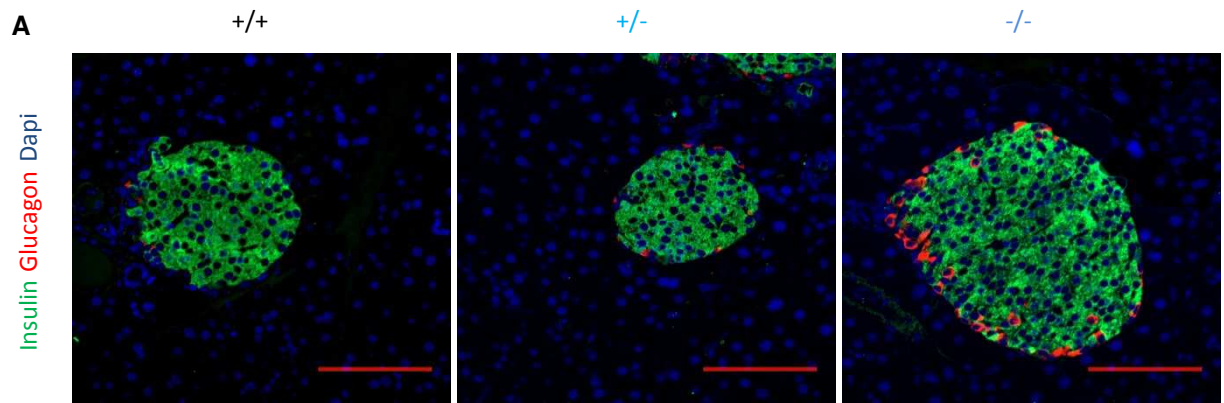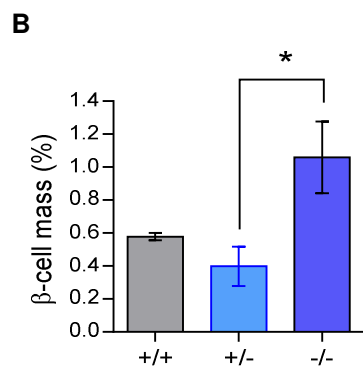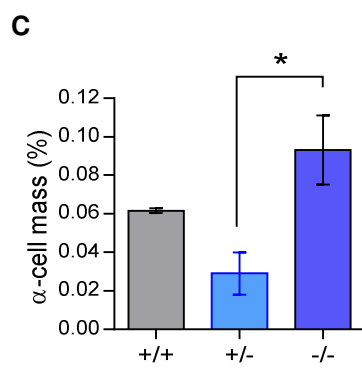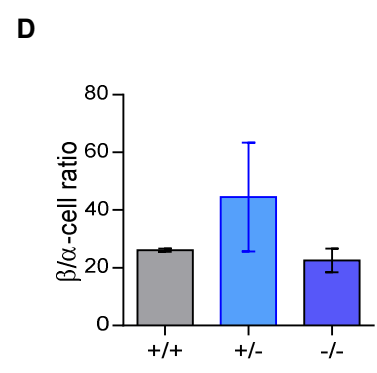

Figure S4

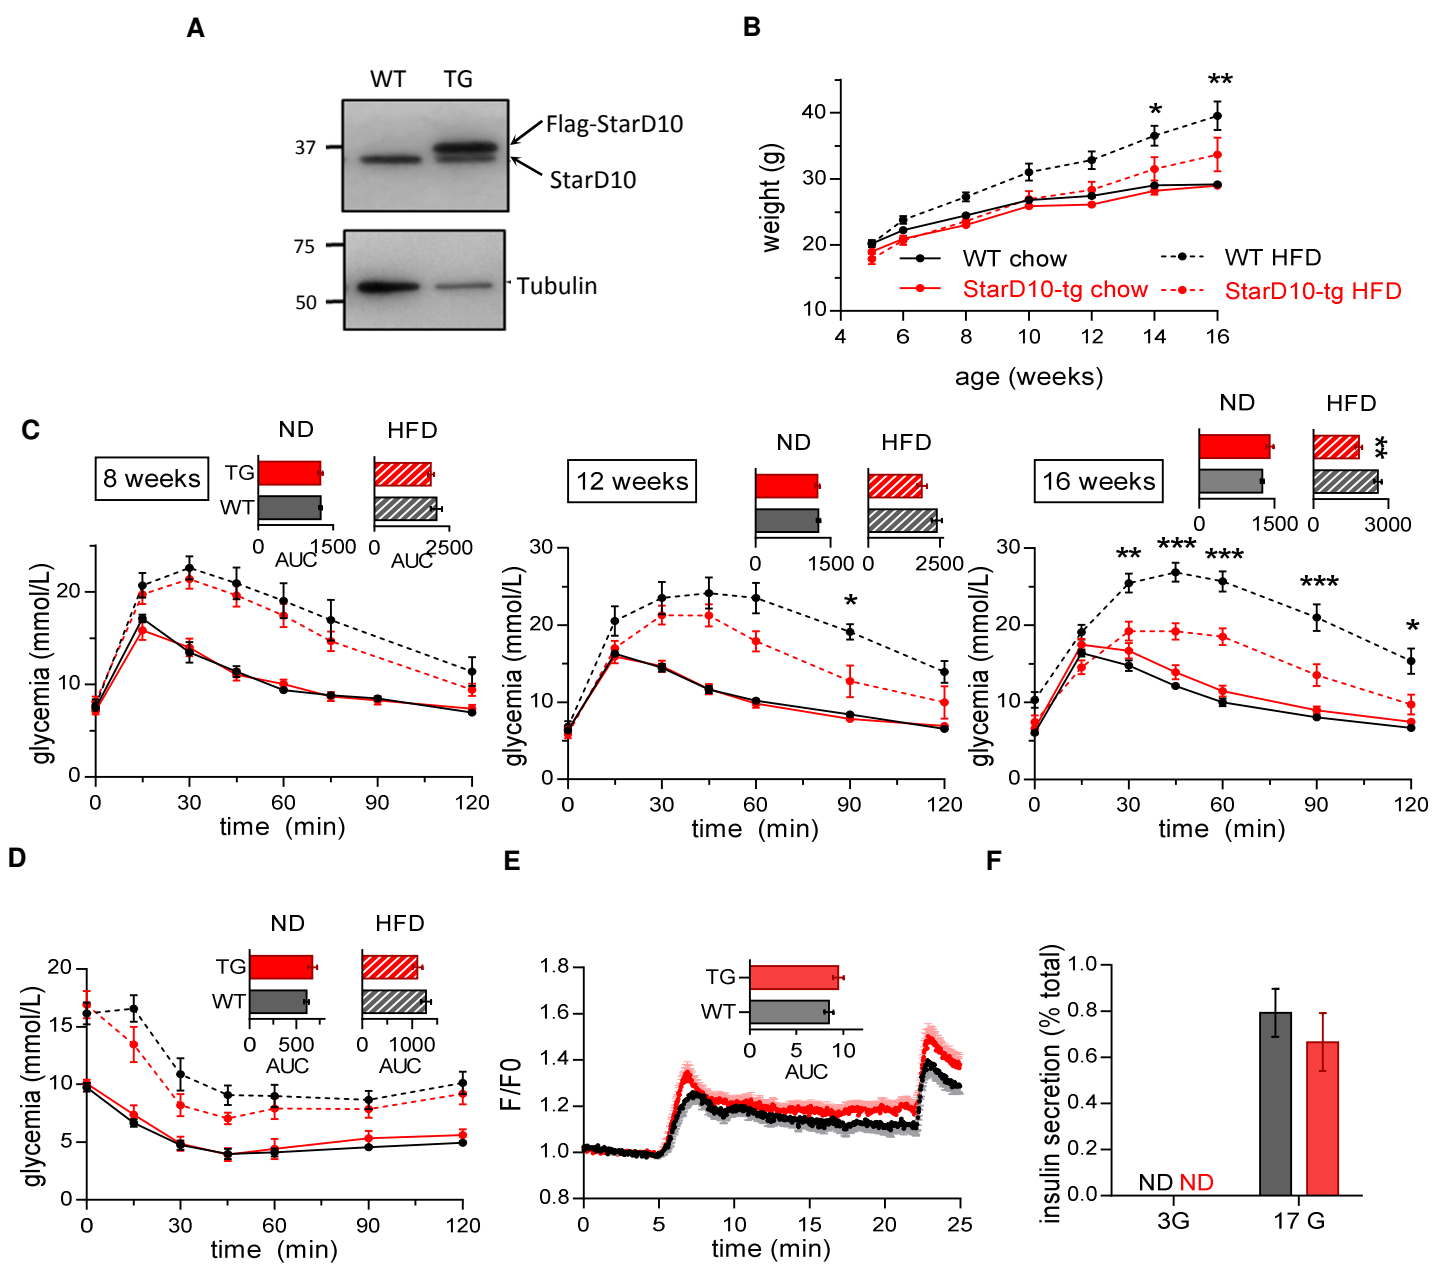

Figure S5

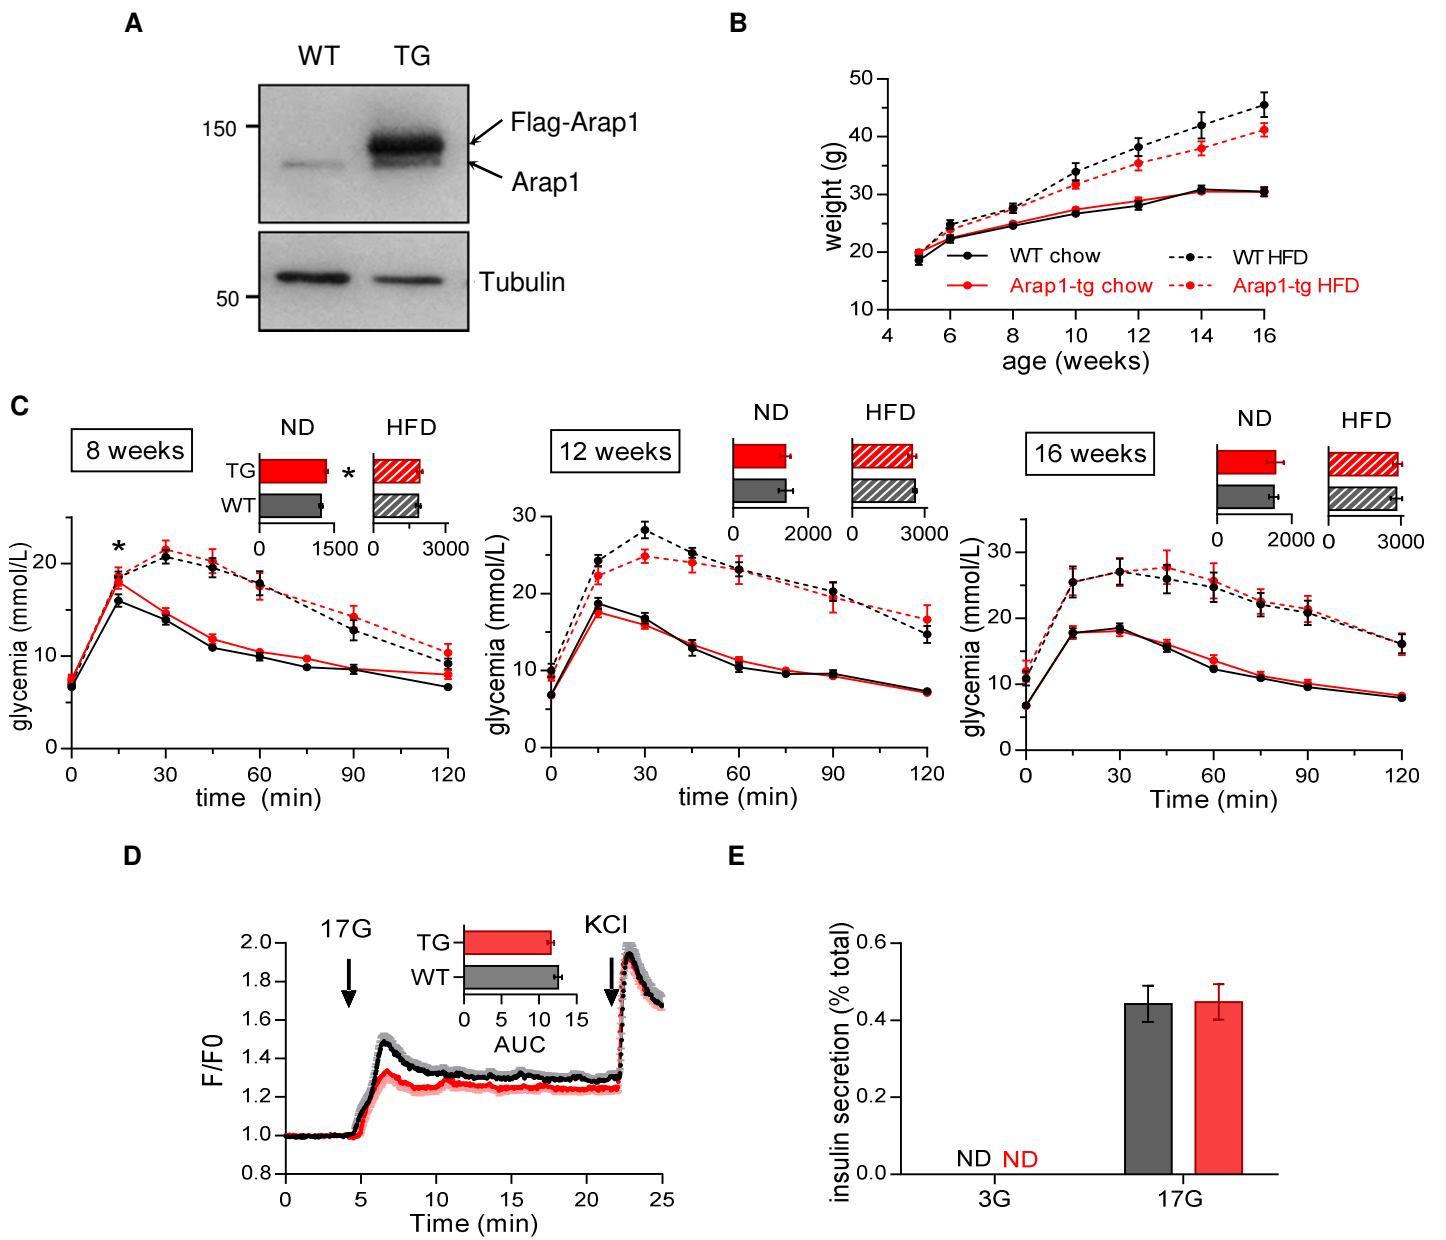

Figure S6

## SUPPLEMENTAL DATA:

### Supplemental figure legends:

#### Figure S1: **Epigenomic annotation at the *STARD10* locus.**

Top panel: posterior causal probabilities of each variant at the T2D signal. Bottom panel: raw signal from pancreatic islets and liver for H3K27ac, H3K4me3 and open chromatin (ATAC-seq or DNAase-seq). The variants most likely to be causal for the T2D signal (box) fall within a region of H3K27ac and open chromatin signal in islets, which are low for all assays in liver. Data are from ENCODE (The ENCODE Project Consortium, 2012)<sup>1</sup> and the NIH Roadmap 2015 (Roadmap Epigenomics Consortium, 2015)<sup>2</sup>.

#### Figure S2: **A region carrying multiple risk variants is physically associated with the *ARAP1* promoter.**

3C-qPCR analysis of long-distance interactions at the *ARAP1-STAR10* locus assessed in human-derived EndoC- $\beta$ H1 cells. The relative level of each ligation product (fragments 12 to 18) is plotted according to its distance (in Kb) from the *ARAP1* promoter 2 (P2). The constant primer and the Taqman probe are indicated in orange. Data were normalized to a *CXCL12* loading control. Blue box: *ARAP1* Promoter2, yellow box: qPCR probe; yellow arrow: qPCR constant primer; red stars: variants. The *NcoI* restriction fragments are indicated below the graph. *NcoI* fragments are numbered from fragment 1 to 18. The data represent the mean of three independent experiments.

#### Figure S3: **Secretory granule distribution and secretion assessed by TIRF Imaging.**

**(A)** Images were captured from single  $\beta$ -cells as described under “Supplemental methods” and show NPY-Venus-labelled granules before (0'), during (3') and after stimulation with 16.7 mM glucose. KCl (20 mM) was subsequently added at 12'. **(B)** Number of morphologically docked granules. Vesicle density was determined on top-hat filtered images as the surface occupied by vesicles on the total surface of the cell, and is related to the number of vesicles present at the membrane vicinity. Vesicle density was averaged on 120 images at 0, 3, 9 and 15 minutes for WT and  $\beta$ *StarD10* KO beta cells ( $n=6$  and  $n=5$  respectively). **(C)** Quantification of exocytotic events. Numbers of secretion events observable were counted per cell and per minutes for WT cells ( $n=5$ ) and  $\beta$ *StarD10* KO cells ( $n=5$ ) when imaged in 3mM Glc, 17mM Glc and 20mM KCl.



**Figure S4: Impact of *StarD10* deletion on  $\beta$ -cell mass.**

Pancreata from control (+/+), heterozygous (+/-) and homozygous (-/-) mice were fixed and subjected to immunohistochemical analysis for insulin and glucagon, as indicated. Representative islets are shown in **(A)**; Scale bar: 100  $\mu$ m).  $\beta$ -cell mass and  $\alpha$ -cell mass represent the percentage of respectively insulin **(B)** and glucagon **(C)** positive staining area over the total pancreas section as measured using ImageJ software.  $\beta$ -cell/ $\alpha$ -cell ratio was measured as the quantification of total insulin/glucagon positive staining on each pancreas section. **(D)** A total of five sections evenly separated by 25  $\mu$ m in each pancreas was used (\* $p$ <0.05 vs +/-;  $n$ =3-4 animals in each group; One-way ANOVA, Tukey post-test).

**Figure S5: Improved glucose tolerance in *StarD10* transgenic mice.**

**(A)** Western blot analysis of *StarD10* expression showing the expression of the endogenous protein (lower band) and the flag-tagged transgene (upper band). **(B)** Growth curves of WT (black) and *StarD10* transgenic (red) male mice maintained on a regular chow diet (plain lines) or high fat diet (dotted lines) from 5 weeks of age. (\* $p$ <0.05, \*\* $p$ <0.01, WT vs *StarD10*-tg on high fat diet, two-way ANOVA, Sidak post-test). **(C)** Intraperitoneal glucose tolerance (1g/kg) was assessed at 8, 12 and 16 weeks of age in male mice. Areas under the curve are shown in inset. ( $n$ =5-11 animals per genotype. \* $p$ <0.05, \*\* $p$ <0.01, \*\*\* $p$ <0.001, two-way ANOVA, Sidak post-test). **(D)** Intraperitoneal insulin tolerance was assessed at 17 weeks of age in mice fed a regular chow diet (0.75U/kg insulin), plain lines or a high fat diet (1U/kg), dotted lines. **(E)** Calcium responses to 17mM glucose and 20mM KCl of islets isolated from both male and female mice. **(F)** Insulin secretion assessed in islets isolated from both male and female, 19-week old WT (black) and littermate *StarD10* transgenic (red) mice on chow diet; ND: not detected;  $n$ =4-5 mice per genotype.

**Figure S6: No effect of *ARAP1* overexpression on glucose tolerance and insulin secretion in mice.**

**(A)** Western blot analysis of *Arap1* expression showing the expression of the endogenous protein (lower band) and the flag-tagged transgene (upper band). **(B)** Body weight of WT (black) and *ARAP1* transgenic (red) male mice maintained on a regular chow diet (plain lines) or high fat diet (dotted lines) from 5 weeks of age. **(C)** Intraperitoneal glucose tolerance (1g/kg) was assessed at 8, 12 and 16 weeks of age in male mice. Areas under the curve are shown in inset.  $n$ =9-12 animals per genotype. \* $p$ <0.05 (\*: 15 min time point WT vs *Arap1*-tg, regular chow diet; two-way ANOVA, Sidak post-test). **(D)**  $\text{Ca}^{2+}$  responses of islets

isolated from both male and female mice to 17mM glucose and 20mM KCl. **(E)** Insulin secretion assessed in islets isolated from both male and female, 19-week old WT (black) and littermate *ARAP1* transgenic (red) mice on regular chow diet. ND: not detected.  $n=2$  mice per genotype.

**Table S1:**Primers for generating the *StarD10* expression construct

| Primer name           | Primer sequence                                                             |
|-----------------------|-----------------------------------------------------------------------------|
| MmStarD10+Flag+NheI_F | tcag <b>ctagc</b> atg <b>gactacaaggatgacgatgacaag</b> GAAAAGCCAGCTGCCTCAACA |
| MmStarD10+XhoI_R      | tcact <b>cgag</b> TCAGGTGAGCGAGGTGTCAT                                      |

Primers for generating the *ARAP1* expression construct

|                    |                                                                             |
|--------------------|-----------------------------------------------------------------------------|
| HArap1+Flag+NheI_F | tcag <b>ctagc</b> atg <b>gactacaaggatgacgatgacaag</b> ACCAAGAAGGAGGAGCCCCCA |
| HArap1+XhoI_R      | tcact <b>cgag</b> TCAGACGTTGCGCAGAAGAG                                      |

Genotyping primers:

*StarD10* whole body KO mice:

|                 |                        |
|-----------------|------------------------|
| STAR10-5arm-WTF | TGGGAAGCTCTTTGAGGGTA   |
| Tm1a-5mut-R1    | GAACTTCGGAATAGGAACTTCG |
| STAR10-Crit-WTR | TGGAAAATCAAATGCCCAA    |

*StarD10* conditional KO mice

|                 |                       |
|-----------------|-----------------------|
| STAR10-5arm-WTF | TGGGAAGCTCTTTGAGGGTA  |
| STAR10-Crit-WTR | TGGAAAATCAAATGCCCAA   |
| Cre_F           | CAGGCGTTTTCTGAGCATACC |
| Cre_R           | CCGGTATTCAACTTGCACCAT |

*StarD10* transgenic mice

|             |                       |
|-------------|-----------------------|
| StarD10_F   | TGAGACTTTTCGACATCGCCC |
| StarD10_R   | CTTGGGACACCTCCAGGAAT  |
| RIP7-rtTA_F | GGACGAGCTCCACTTAGACG  |
| RIP7-rtTA_R | CAACATGTCCAGATCGAAATC |

*Arap1* conditional KO mice:

|                |                       |
|----------------|-----------------------|
| ARAP1-5arm-WTF | CCTCTTGGTCACTCCCATGT  |
| ARAP1-Crit-WTR | ATCTCCACCCTCAACCTCCT  |
| Cre_F          | CAGGCGTTTTCTGAGCATACC |
| Cre_R          | CCGGTATTCAACTTGCACCAT |

*ARAP1* transgenic mice

|             |                         |
|-------------|-------------------------|
| ARAP1_F     | TGCTTCTCAGACACGAACCA    |
| ARAP1_R     | CTTCCTCATCCACACTAAACACC |
| RIP7-rtTA_F | GGACGAGCTCCACTTAGACG    |
| RIP7-rtTA_R | CAACATGTCCAGATCGAAATC   |

## References

1. Gerstein MB, Kundaje A, Hariharan M, Landt SG, Yan KK, Cheng C, Mu XJ et al (2012) Architecture of the human regulatory network derived from ENCODE data. *Nature* 489 (7414):91-100
2. Kundaje A, Meuleman W, Ernst J, Bilenky M, Yen A, Heravi-Moussavi A, Kheradpour P et al (2015) Integrative analysis of 111 reference human epigenomes. *Nature* 518 (7539):317-330
